# Supplementary material for: Combination of a hypomethylating agent and inhibitors of PARP and HDAC traps PARP1 and DNMT1 to chromatin, acetylates DNA repair proteins, down-regulates NuRD and induces apoptosis in human leukemia and lymphoma cells
Source: PubMed Central journal article supplement (PMC5790510; doi:10.18632/oncotarget.23386), 2017-12-17
Supplement: oncotarget-09-3908-s001.pdf [file oncotarget-09-3908-s001.pdf]

## Combination of a hypomethylating agent and inhibitors of PARP and HDAC traps PARP1 and DNMT1 to chromatin, acetylates DNA repair proteins, down-regulates NuRD and induces apoptosis in human leukemia and lymphoma cells

### SUPPLEMENTARY MATERIALS

**Supplementary Table 1: Identified acetylated lysine residues searched from the post-translational modification database (PHOSIDA)\***

| Protein         | Process involved                          | Peptide Sequence | Lys position |
|-----------------|-------------------------------------------|------------------|--------------|
| Ku70/XRCC6      | DSB repair via NHEJ                       | LEASGDYKYSGRDSL  | 30           |
|                 |                                           | SRQIILEKEETEELK  | 330          |
|                 |                                           | KEETEELKRFDDPGL  | 337          |
|                 |                                           | ATPEQVGKMKAIVEK  | 460          |
|                 |                                           | KMKAIVEKLRFTYRS  | 467          |
| Ku80/XRCC5      | DSB repair via NHEJ                       | DLSSRFKSQLDIII   | 143          |
|                 |                                           | HGPSFPLKGITEQQK  | 194          |
|                 |                                           | SIRIAAYKSILQERV  | 264          |
|                 |                                           | KVDEEQMKYKSEGKC  | 331          |
|                 |                                           | MKYKSEGKCFSVLGF  | 337          |
|                 |                                           | KSQIPLSKIKTLFPL  | 531          |
|                 |                                           | QRFNNFLKALQEKVE  | 659          |
| FLKALQEKVEIKQLN | 664                                       |                  |              |
| PARP1           | ADP-ribosylation,<br>Base-excision repair | EAGGVTGKGQDGIGS  | 96           |
|                 |                                           | GQDGIGSKAEKTLGD  | 104          |
|                 |                                           | TCKGCMKIEKGQVR   | 130          |
|                 |                                           | GTVIGSNKLEQMPSK  | 599          |
|                 |                                           | FMKLYEEKTGNAWHS  | 620          |
| DDB1            | Nucleotide excision repair                | DRDNKELKAFNIRLE  | 153          |
|                 |                                           | KVIKSVGKIEHSFWR  | 1067         |
| CHD4            | NuRD component                            | RLKNNQSKFFRVLNG  | 884          |
|                 |                                           | PMQKKYYKYILTRNF  | 987          |
|                 |                                           | KGAADVEKVEEKSAI  | 1643         |
| Histone 3       | nucleosome assembly                       | RTKQTARKSTGGKAP  | 9            |
|                 |                                           | ARKSTGGKAPRKQLA  | 14           |
|                 |                                           | TGGKAPRKQLATKAA  | 18           |
|                 |                                           | PRKQLATKAARKSAP  | 23           |
|                 |                                           | LATKAARKSAPSTGG  | 27           |
|                 |                                           | APSTGGVKKPHRYRP  | 36           |
|                 |                                           | REIRRYQKSTELLIR  | 56           |
|                 |                                           | REIAQDFKTDLRFQS  | 79           |
|                 |                                           | KRVTIMPKDIQLARR  | 122          |

\* 141.61.102.18/phosida/index.aspx.

**Supplementary Table 2: List of primary antibodies, their sources and dilutions**

| <b>Antigen</b>        | <b>Source/Cat. #</b>     | <b>Clone type*</b> | <b>Dilution**</b> |
|-----------------------|--------------------------|--------------------|-------------------|
| $\beta$ -ACTIN        | Sigma/A5316              | mAb                | 6000              |
| ATM                   | Santa Cruz Biotech/25921 | mAb                | 750               |
| P-ATM (S1981)         | Rockland/200-301-400     | mAb                | 2000              |
| CHD3                  | Cell Signaling/4241      | pAb                | 3000              |
| CHD4                  | Cell Signaling/11912     | mAb-R              | 3000              |
| CHK2                  | Cell Signaling/2662      | pAb                | 2500              |
| P-CHK2 (S19)          | Cell Signaling/2666      | pAb                | 2500              |
| Cleaved CASPASE 3     | Cell Signaling/9661      | pAb                | 2500              |
| DDB1                  | GeneTex/100130           | pAb                | 3000              |
| DNMT1                 | Santa Cruz Biotech/10222 | pAb                | 700               |
| HDAC1                 | Cell Signaling/5356      | mAb                | 2500              |
| HDAC2                 | Cell Signaling/5113      | mAb                | 2500              |
| Ac-Histone 3 Lys4     | Active Motif/39381       | pAb                | 2500              |
| $\gamma$ -Histone 2AX | EMD Millipore/05-636     | mAb                | 3000              |
| Histone 3             | Abcam//1791              | pAb                | 3000              |
| Ku70                  | Own Laboratory           | mAb                | 500               |
| Ku80                  | Cell Signaling/2180      | mAb-R              | 2500              |
| MBD3                  | Cell Signaling/14540     | pAb                | 3000              |
| MDR1/ABCB1            | Abcam/170904             | mAb                | 2000              |
| MRP1/ABCC1            | Abcam/24102              | mAb                | 2000              |
| MTA1                  | Cell Signaling/5647      | mAb-R              | 2500              |
| NBS1                  | Cell Signaling/3002      | pAb                | 2500              |
| Nucleoporin           | Santa Cruz Biotech/48373 | mAb                | 700               |
| PAR                   | Trevigen/#4336-BPC-100   | pAb                | 3500              |
| PARP1                 | Santa Cruz Biotech/8007  | mAb                | 1000              |
| RAD50                 | Cell Signaling/3427      | pAb                | 2500              |
| RBAP46                | Cell Signaling/6882      | pAb                | 2500              |

\*pAb: polyclonal antibody; used anti-rabbit IgG for secondary antibody from Bio-Rad Lab.

mAb: monoclonal antibody; used anti-mouse IgG for secondary antibody from Bio-Rad Lab.

mAb-R: rabbit monoclonal antibody.

\*\*Fold dilution in PBS with 0.05% Tween 20.
